# Supplementary material
Source: PubMed Central journal article supplement (PMC7253452)
Supplement: 41431_2020_571_MOESM3_ESM.pdf [file 41431_2020_571_MOESM3_ESM.pdf]

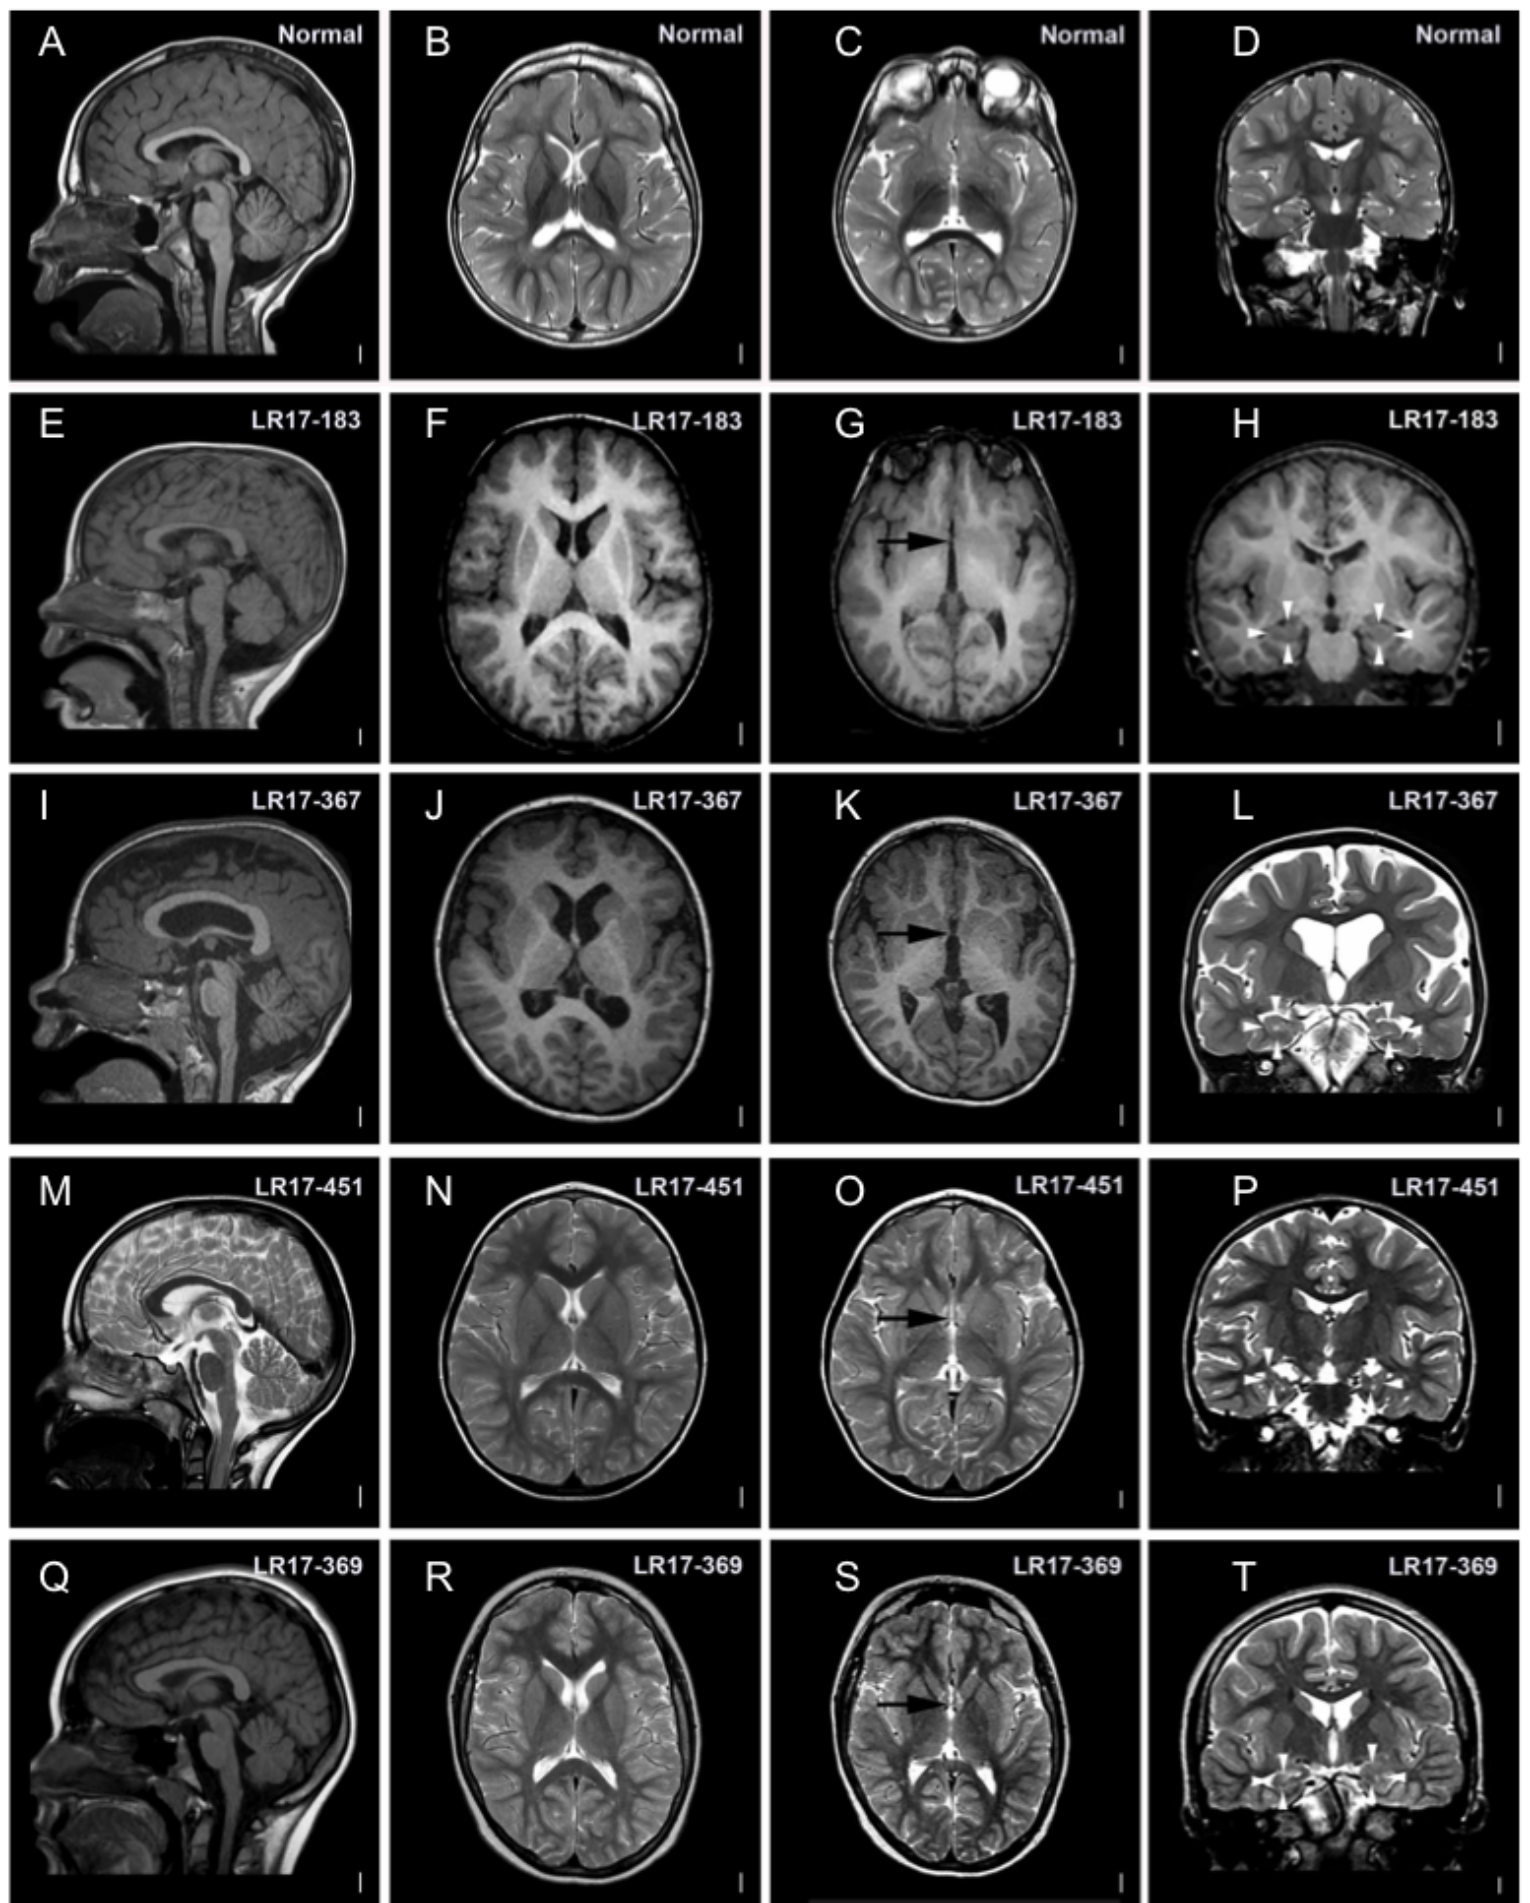

Figure S1: Brain MRIs of the other *TBR1* pathogenic variant individuals showing cortical gyral anomalies (white arrows), anomalies of the anterior commissure (black arrowheads) and hippocampal anomalies (white arrowheads).
